# Supplementary material
Source: Springer Nature journal article supplement (https://www.springermedizin.de/resource/supplementary/12958_2010_710_MOESM1_ESM.pdf/9568650)
Supplement: MOESM1 [file 9568650]

Family 1

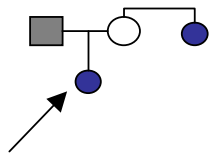

Family 2

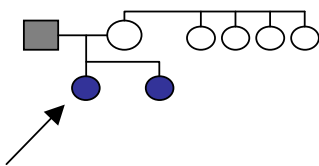

Family 3

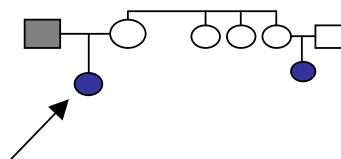

Family 4

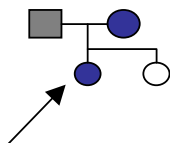

Family 5

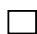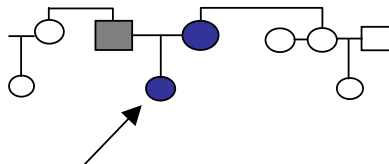

Family 6

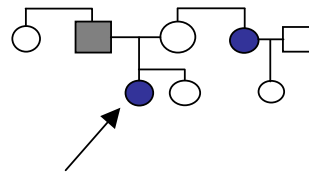

Family 7

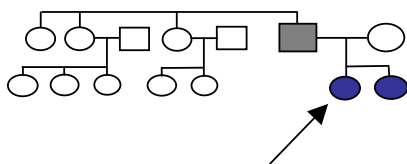

Family 8

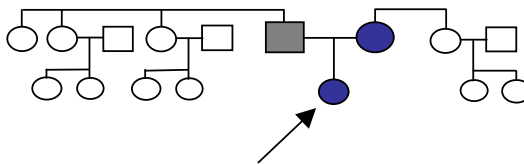

Family 9

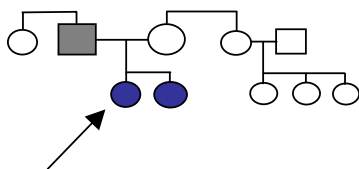

Family 10

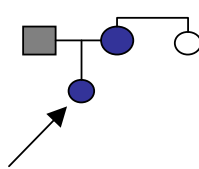

Family 11

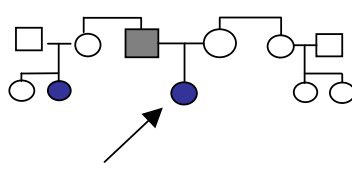

Family 12

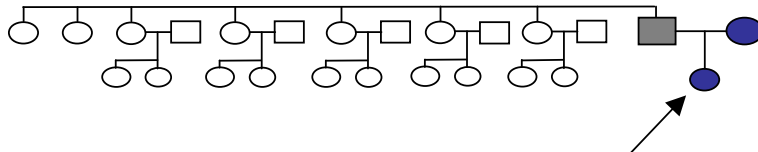

○ = female; □ = male; ■ = patient's father; ● = relative suffering from endometriosis  
 the arrows mark patients in whom endometriosis was confirmed by laparoscopy
